# Supplementary material for: Sulforaphane Ameliorates Nonalcoholic Fatty Liver Disease Induced by High-Fat and High-Fructose Diet via LPS/TLR4 in the Gut–Liver Axis
Source: MDPI journal article supplement (doi:10.3390/nu15030743), 2023-02-01
Supplement: s1 [file s1]

## Supplementary material

Table S1 Primer sequences used for RT-qPCR

| Gene      | Forward primer (5'→ 3') | Reverse primer (5'→ 3') |
|-----------|-------------------------|-------------------------|
| β-actin   | GGCTGTATTCCCCTCCATCG    | CCAGTTGGTAACAATGCCATGT  |
| ZO-1      | ACCACCAACCCGAGAAGAC     | CAGGAGTCATGGACGCACA     |
| Claudin-4 | GTCCTGGGAATCTCCTTGGC    | TCTGTGCCGTGACGATGTTG    |
| TLR4      | ATGGCATGGCTTACACCACC    | GAGGCCAATTTTGTCTCCACA   |
| MyD88     | TCATGTTCTCCATACCCTTGGT  | AAACTGCGAGTGGGGTTCAG    |
| NF-κB     | ATGGCAGACGATGATCCCTAC   | TGTTGACAGTGGTATTTCTGGTG |
| TNF-α     | GACGTGGAAGTGGCAGAAGAG   | TTGGTGGTTTGTGAGTGTGAG   |
| IL-1β     | GCAACTGTTCTTGAAGTCAACT  | ATCTTTTGGGGTCCGTCAACT   |
| IL-6      | TGAACAACGATGATGCACTTG   | CTGAAGGACTCTGGCTTTGTC   |
| CCL2      | TTAAAAACCTGGATCGGAACCAA | GCATTAGCTTCAGATTTACGGGT |
| CCL4      | TTCCTGCTGTTTCTCTTACACCT | CTGTCTGCCTCTTTTGGTCAG   |
| GPR78     | ACTTGGGGACCACCTATTCCT   | ATCGCCAATCAGACGCTCC     |
| IRE1α     | ACACTGCCTGAGACCTTGTTG   | GGAGCCCGTCCTCTTGCTA     |
| TRAF2     | AGAGAGTAGTTCGGCCTTTCC   | GTGCATCCATCATTGGGACAG   |
| JNK       | AGCAGAAGCAAACGTGACAAC   | GCTGCACACACTATTCCTTGAG  |
| CHOP      | CCACCACACCTGAAAGCAGAA   | AGGTGAAAGGCAGGGACTCA    |
